# Supplementary material for: Long-lived (minutes) photoinduced charge separation in a structured periodic mesoporous titania containing 2,4,6-triphenylpyrylium as guest
Source: Royal Society of Chemistry journal article supplement (doi:10.1039/b807453d), 2008-01-01
Supplement: b807453d.pdf [file b807453d.pdf]

## SUPPLEMENTARY INFORMATION

### Long-lived (minutes) photoinduced charge separation in a structured periodic mesoporous titania containing 2,4,6-triphenylpyrylium as guest

Carmela Aprile,<sup>†</sup> Luca Maretti,<sup>‡</sup> Mercedes Alvaro,<sup>†</sup> and J. C. Scaiano<sup>‡\*</sup> Hermenegildo Garcia<sup>†\*</sup>

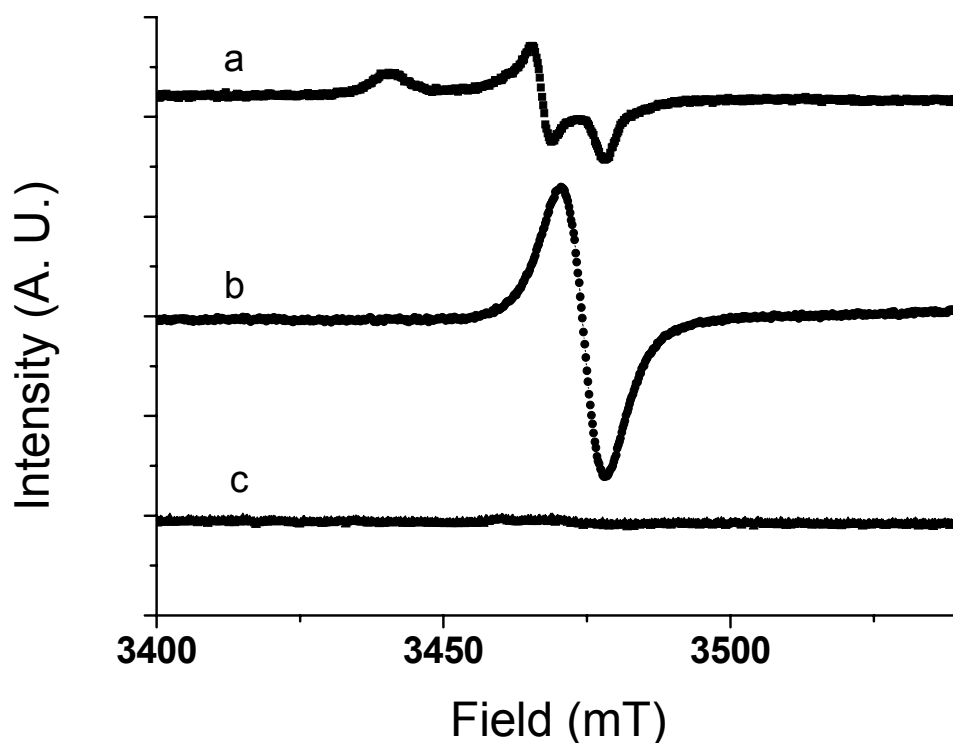

Figure S1. EPR spectra of the tetrafluoroborate salt of TP<sup>+</sup> adsorbed on TiO<sub>2</sub> nanoparticles (2.8 wt%) used as building blocks for the preparation of mpTiO<sub>2</sub> materials: a) before irradiation; b) 10 minutes after UV irradiation for 30 minutes (50 W Xe lamp); c) same sample 8 h after irradiation.
